# Supplementary material for: Continuous Butanol Fermentation of Dilute Acid-Pretreated De-oiled Rice Bran by Clostridium acetobutylicum YM1
Source: PubMed Central journal article supplement (PMC6420626; doi:10.1038/s41598-019-40840-y), 2019-03-15
Supplement: 41598_2019_40840_MOESM1_ESM.pdf [file 41598_2019_40840_MOESM1_ESM.pdf]

In accordance to Nature Publishing Groups Authorship Policy we agree to change the authors of the manuscript as indicated below.

**NAME OF JOURNAL:** Scientific Reports

**TITLE OF MANUSCRIPT:** Continuous Butanol Fermentation of Dilute Acid-Pretreated De-oiled Rice Bran by *Clostridium acetobutylicum* YM1

**MANUSCRIPT NUMBER:** SREP-18-02725C

**CORRESPONDING AUTHORS NAME:** Mohd Sahaid Kalil & Najeeb Kaid Nasser Al-Shorgani

**PREVIOUS AUTHOR NAMES:**

Najeeb Kaid Nasser Al-Shorgani, Abdualati Ibrahim Al-Tabib, Abudukeremu Kadier, & Mohd Sahaid Kalil

**UPDATED AUTHOR NAMES:**

Najeeb Kaid Nasser Al-Shorgani, Abdualati Ibrahim Al-Tabib, Abudukeremu Kadier, Mohd Fauzi Zanil, Kiat Moon Lee & Mohd Sahaid Kalil

**CHANGE TO AUTHOR LIST:** In the second round revision, the reviewers asked for economic analysis to improve the manuscript. The economic analysis has been performed by Mohd Fauzi Zanil and Kiat Moon Lee. Therefore, these two authors have been added as they contributed to this manuscript.

| Print Name                     | Signature                                                                           | Date          |
|--------------------------------|-------------------------------------------------------------------------------------|---------------|
| Najeeb Kaid Nasser Al-Shorgani |  | 11/11/2018    |
| Abdualati Ibrahim Al-Tabib     |  | 11/11/2018    |
| Abudukeremu Kadier             |  | 12/11/2018    |
| Mohd Fauzi Zanil               |  | 11/11/2018    |
| Kiat Moon Lee                  | Kiatmoon                                                                            | 11th Nov 2018 |
| Mohd Sahaid Kalil              |  | 12/11/2018    |
|                                |                                                                                     |               |
